# Supplementary material for: Process evaluation findings from Strong Hearts, Healthy Communities 2.0: a cardiovascular disease prevention intervention for rural women
Source: PubMed Central journal article supplement (PMC11515669; doi:10.1186/s12966-024-01670-y), 2024-10-22
Supplement: 12966_2024_1670_MOESM1_ESM.pdf [file 12966_2024_1670_MOESM1_ESM.pdf]

## Strong Hearts, Healthy Communities Class Activities Overview

|          |                                                                                    | Aerobic Exercise | Strength Training | Nutrition Topic | HEART Club | Program Leader Teaches | Group Discussion | Activity | On the Menu |
|----------|------------------------------------------------------------------------------------|------------------|-------------------|-----------------|------------|------------------------|------------------|----------|-------------|
|          | Icon indicates that activity or topic is part of the class.                        |                  |                   |                 |            |                        |                  |          |             |
| Class 1  | Welcome                                                                            |                  |                   |                 |            |                        |                  |          |             |
| Class 2  | Where You Are and Where You Want To Be Part 1                                      |                  |                   |                 |            |                        |                  |          |             |
| Class 3  | Physical Activity and Heart Disease in Women                                       |                  |                   |                 |            |                        |                  |          |             |
| Class 4  | Healthy Eating: Fruits and Vegetables                                              |                  |                   |                 |            |                        |                  |          |             |
| Class 5  | Weight Management and Fitness                                                      |                  |                   |                 |            |                        |                  |          |             |
| Class 6  | Healthy Eating: Fats and Proteins                                                  |                  |                   |                 |            |                        |                  |          |             |
| Class 7  | Strength Training Essentials                                                       |                  |                   |                 |            |                        |                  |          |             |
| Class 8  | Healthy Eating: Grains and Dairy                                                   |                  |                   |                 |            |                        |                  |          |             |
| Class 9  | Remodeling Your Home Environment Part 1: Making the Healthy Choice the Easy Choice |                  |                   |                 |            |                        |                  |          |             |
| Class 10 | Remodeling Your Home Environment Part 2: Making the Healthy Choice the Easy Choice |                  |                   |                 |            |                        |                  |          |             |
| Class 11 | Healthy Eating Away From Home                                                      |                  |                   |                 |            |                        |                  |          |             |
| Class 12 | Healthier Recipes                                                                  |                  |                   |                 |            |                        |                  |          |             |

|          |                                               |                                                                                      |                                                                                       |                                                                                       |
|----------|-----------------------------------------------|--------------------------------------------------------------------------------------|---------------------------------------------------------------------------------------|---------------------------------------------------------------------------------------|
| Class 13 | Healthy Drinking and Emotional Eating         |    |    |    |
| Class 14 | Putting it all Together: Meal Planning Part 1 |    |    |    |
| Class 15 | Putting it all Together: Meal Planning Part 2 |    |    |                                                                                       |
| Class 16 | Physical Activity                             |     |    |    |
| Class 17 | Healthy Eating: Snacks and Treats             |    |    |                                                                                       |
| Class 18 | HEART Club: Introduction                      |     |    |    |
| Class 19 | HEART Club: Community Assessment Part 1       |                                                                                      |    |    |
| Class 20 | HEART Club: Community Assessment Part 2       |     |    |                                                                                       |
| Class 21 | Healthy Eating and Cooking Part 1             |  |  |  |
| Class 22 | Healthy Eating and Cooking Part 2             |  |  |                                                                                       |
| Class 23 | Healthy Eating: Dinner                        |  |  |  |
| Class 24 | HEART Club: Issue Selection                   |   |  |                                                                                       |
| Class 25 | HEART Club: Purpose                           |   |  |  |
| Class 26 | Where You Are and Where You Want To Be Part 2 |   |  |                                                                                       |
| Class 27 | Learning About Where You Shop for Food        |  |  |                                                                                       |
| Class 28 | Heart-Healthy Grocery Shopping                |  |  |                                                                                       |
| Class 29 | HEART Club: Unified Message and Asset Mapping |                                                                                      |  |  |
| Class 30 | Putting it all Together: Meal Planning Part 3 |  |  |                                                                                       |
| Class 31 | HEART Club: Benchmarks                        |   |  |  |

|          |                                                                            |                                                                                                                                                                                                                                                                                                                                                                                                                                                                                                                    |
|----------|----------------------------------------------------------------------------|--------------------------------------------------------------------------------------------------------------------------------------------------------------------------------------------------------------------------------------------------------------------------------------------------------------------------------------------------------------------------------------------------------------------------------------------------------------------------------------------------------------------|
| Class 32 | HEART Club: Action Planning                                                |                                                                                                                                                                            |
| Class 33 | Mindful Eating and Activity                                                |       |
| Class 34 | HEART Club: Identifying Stakeholders                                       |                                                                                                                                                                            |
| Class 35 | Community Health and Well-Being                                            |                                                                                         |
| Class 36 | HEART Club: Check-In                                                       |                                                                                                                                                                            |
| Class 37 | HEART Club: Future Directions Part 1                                       |                                                                                                                                                                            |
| Class 38 | More Mindful Eating                                                        |       |
| Class 39 | Emotional Eating                                                           |                                                                                                                                                                             |
| Class 40 | HEART Club: Future Directions Part 2                                       |                                                                                    |
| Class 41 | Social Environment                                                         |                                                                                                                                                                    |
| Class 42 | HEART Club: HEART Charter                                                  |                                                                               |
| Class 43 | Supports and Barriers                                                      |                                                                                                                                                                    |
| Class 44 | Sustaining Eating Well                                                     |                                                                                                                                                                     |
| Class 45 | Sustaining Physical Activity                                               |                                                                               |
| Class 46 | Revisiting Stress Reduction                                                |                                                                               |
| Class 47 | Problem-Solving Process and Action Planning: 6 weeks, 6 months, and 1 year |                                                                               |
| Class 48 | Celebration of Completion                                                  |                                                                                                                                                                    |
